# Supplementary material for: Substitution effects of Ru–terpyridyl complexes on photovoltaic and carrier transport properties in dye-sensitized solar cells
Source: Royal Society of Chemistry journal article supplement (doi:10.1039/c3ta12152f), 2013-01-01
Supplement: c3ta12152f.pdf [file c3ta12152f.pdf]

## Supporting Information

### Substitution effects of Ru-terpyridyl complexes on photovoltaic and carrier transport properties in dye-sensitized solar cells

Youhei Numata, Ashrafal Islam, Keitaro Sodeyama, Zhen-Hua Chen, Yoshitaka Tateyama and Liyuan Han\*

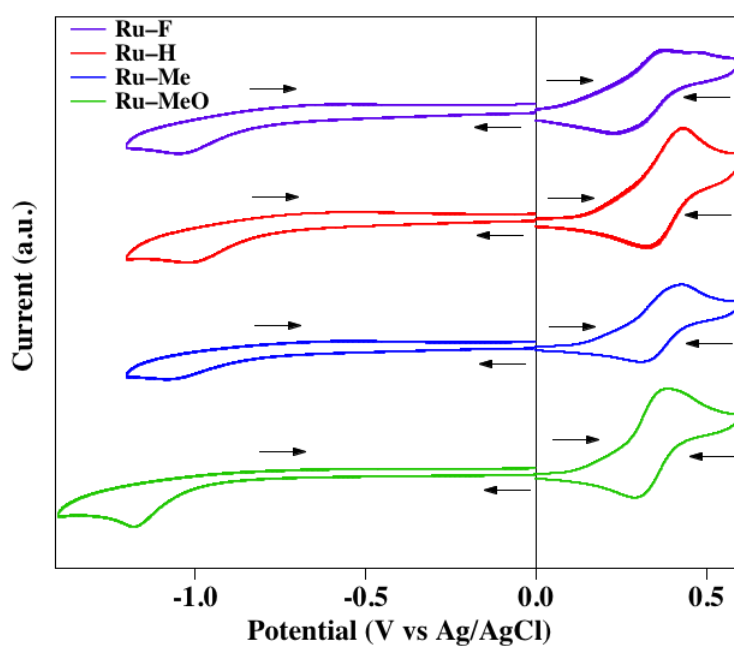

**Fig. S1** CV spectra of the four Ru-dctpy dyes in MeCN solutions.

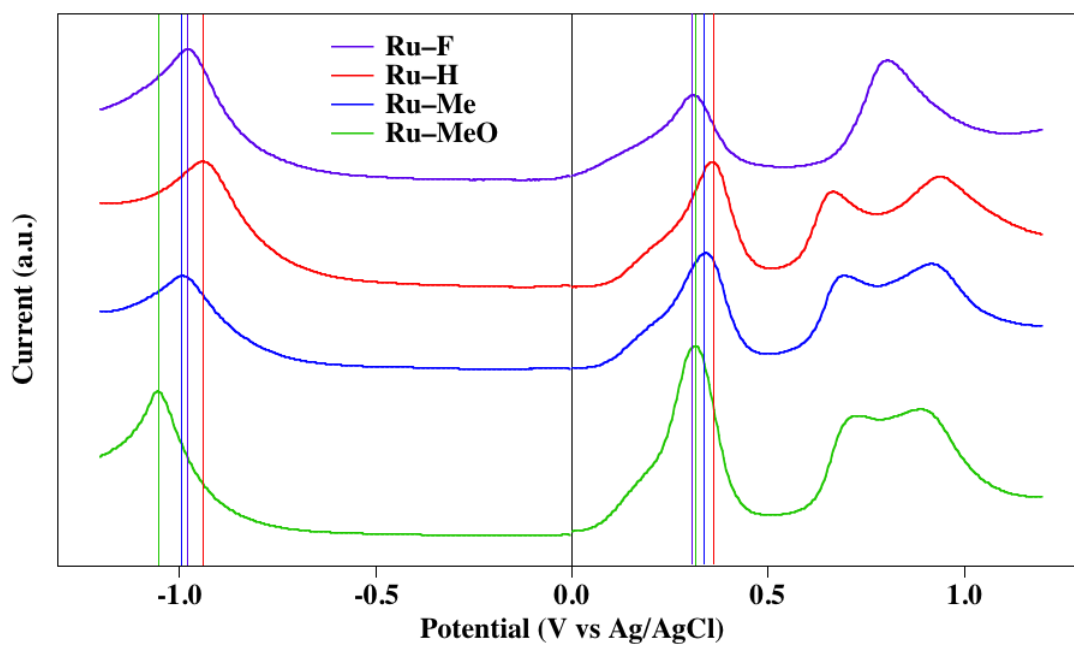

Fig. S2 DPV spectra of the four Ru-dctpy dyes in MeCN solutions.

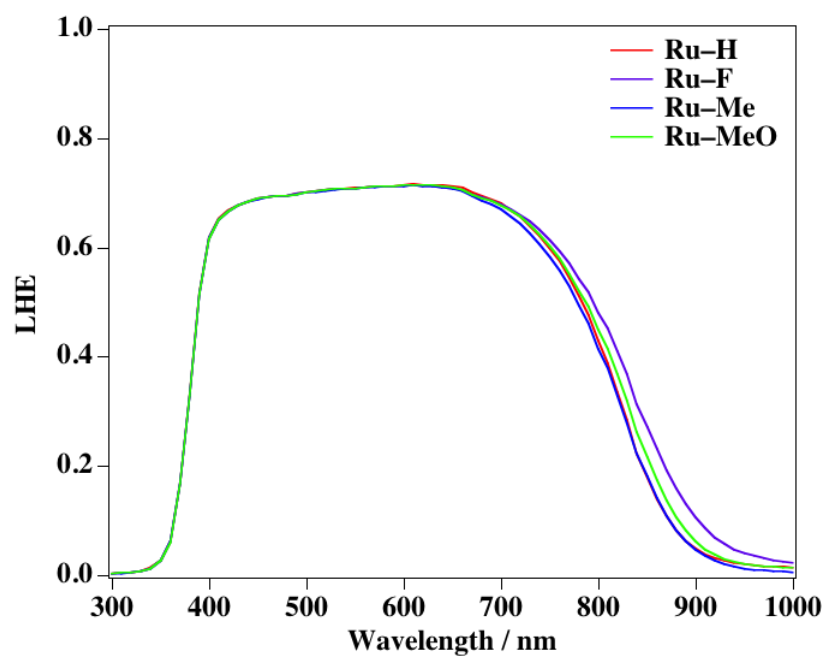

Fig. S3 LHE spectra of the four Ru-dctpy dyes on TiO<sub>2</sub> substrate (26 μm thickness).

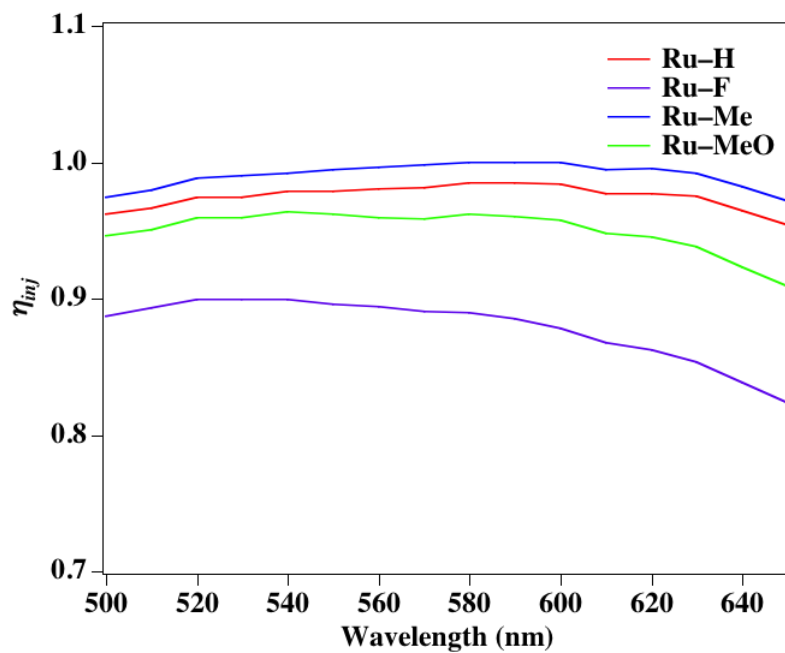

Fig. S4 Electron injection efficiencies ( $\eta_{inj}$ ) of Ru-dctpy dyes.

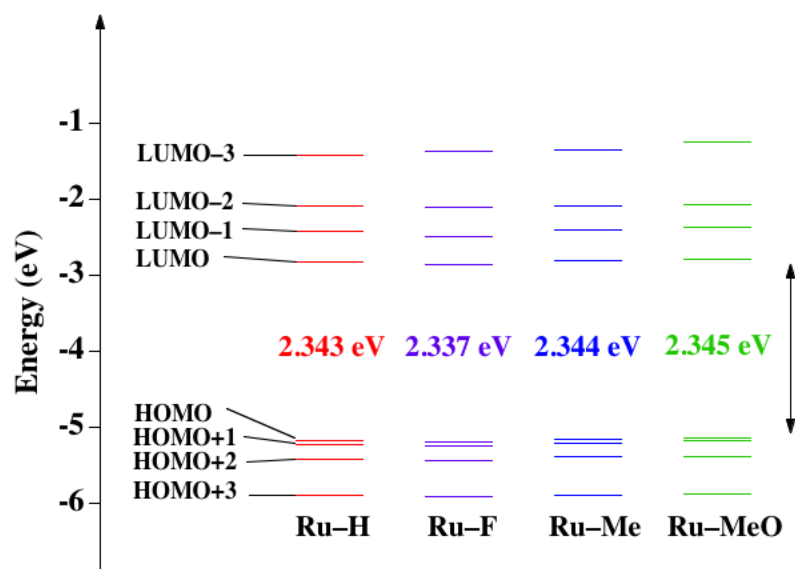

Fig. S5 Calculated frontier MO level diagram of Ru-dctpy dyes.

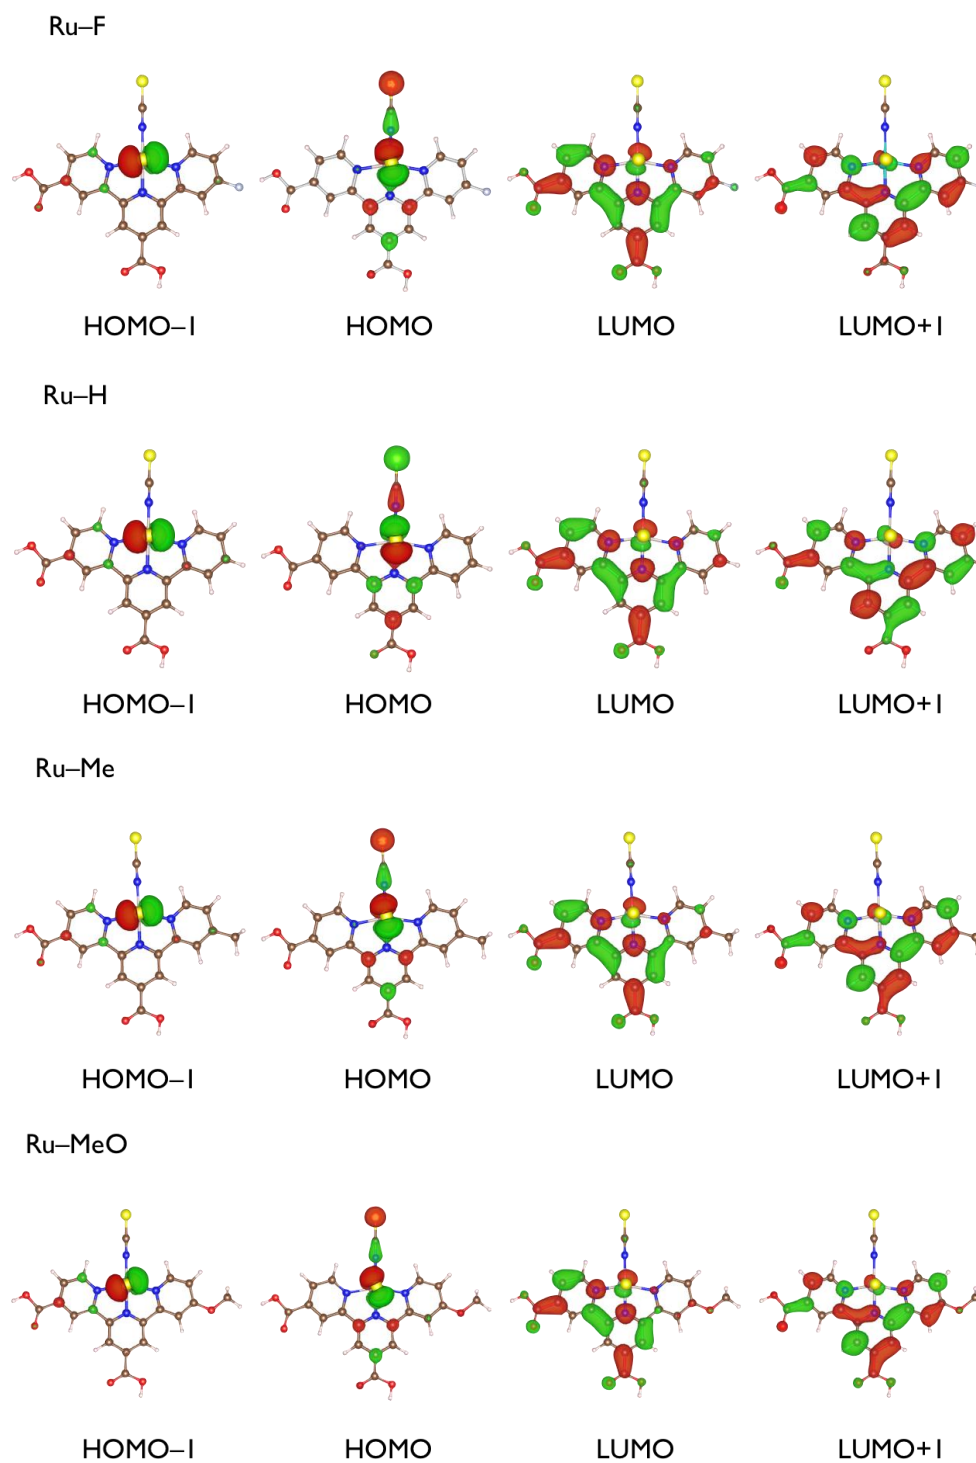

**Fig. S6** Calculated HOMOs and LUMOs distributions of Ru-dctpy dyes. Isodensity surface values are 0.3.

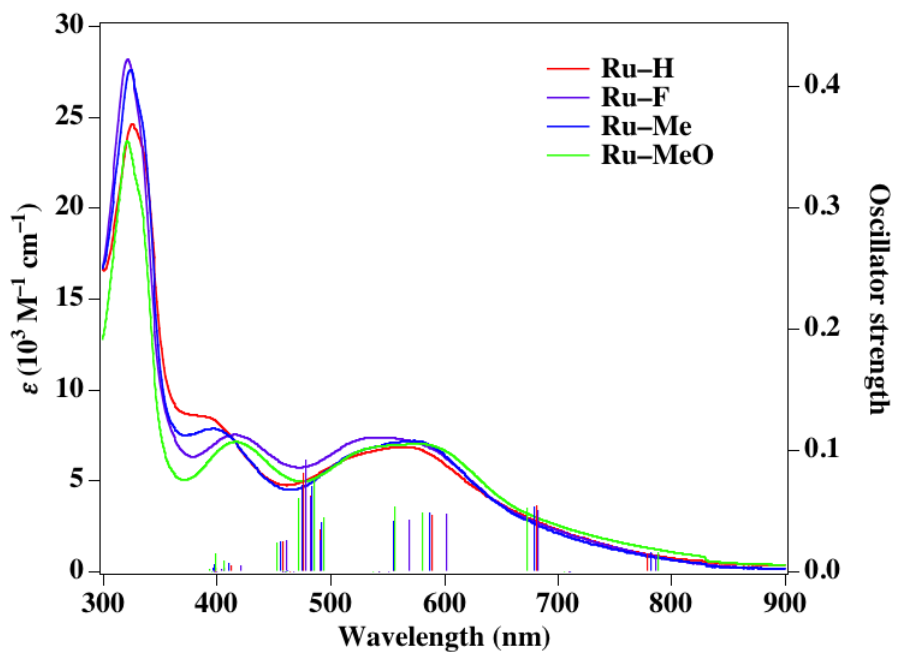

**Fig. S7** Experimental UV spectra and calculated oscillator strengths (15 transitions from lower energy) for the Ru-dctpy dyes.

**Table S1.** Selected results of the TD-DFT excited-state transitions for **Ru–H**.

| State | Excitation energy [nm] | $f$    | Main MO transitions with their probabilities |          |
|-------|------------------------|--------|----------------------------------------------|----------|
| 1     | 779.12                 | 0.0151 | HOMO-1 -> LUMO                               | (81.8 %) |
|       |                        |        | HOMO -> LUMO                                 | (14.9 %) |
| 2     | 681.69                 | 0.0541 | HOMO-1 -> LUMO                               | (11.8 %) |
|       |                        |        | HOMO-1 -> LUMO+1                             | (11.5 %) |
|       |                        |        | HOMO -> LUMO                                 | (72.3 %) |
|       |                        |        | HOMO -> LUMO+1                               | (2.3 %)  |
| 3     | 590.29                 | 0.0464 | HOMO-1 -> LUMO+1                             | (18.7 %) |
|       |                        |        | HOMO -> LUMO+1                               | (78.2 %) |
| 4     | 556.29                 | 0.0374 | HOMO-1 -> LUMO                               | (2.3 %)  |
|       |                        |        | HOMO-1 -> LUMO+1                             | (64.2 %) |
|       |                        |        | HOMO -> LUMO                                 | (9.2 %)  |
|       |                        |        | HOMO -> LUMO+1                               | (15.6 %) |
|       |                        |        | HOMO -> LUMO+2                               | (5.7 %)  |
| 5     | 491.37                 | 0.035  | HOMO-3 -> LUMO                               | (7.9 %)  |
|       |                        |        | HOMO-1 -> LUMO+2                             | (5.5 %)  |
|       |                        |        | HOMO -> LUMO+2                               | (81.3 %) |
| 6     | 482.61                 | 0.062  | HOMO-3 -> LUMO                               | (13.9 %) |
|       |                        |        | HOMO-1 -> LUMO+2                             | (81.0 %) |
| 7     | 477.13                 | 0.0816 | HOMO-3 -> LUMO                               | (77.2 %) |
|       |                        |        | HOMO-1 -> LUMO+2                             | (9.1 %)  |
|       |                        |        | HOMO -> LUMO+2                               | (9.7 %)  |
| 8     | 458.71                 | 0.0245 | HOMO-5 -> LUMO                               | (96.5 %) |
| 9     | 395.58                 | 0.0357 | HOMO-7 -> LUMO                               | (20.5 %) |
|       |                        |        | HOMO -> LUMO+3                               | (72.4 %) |
|       |                        |        | HOMO -> LUMO+4                               | (3.0 %)  |
| 10    | 387.38                 | 0.0171 | HOMO-8 -> LUMO                               | (9.2 %)  |
|       |                        |        | HOMO-7 -> LUMO                               | (3.1 %)  |
|       |                        |        | HOMO-1 -> LUMO+3                             | (84.0 %) |
| 11    | 368.56                 | 0.0126 | HOMO-3 -> LUMO+2                             | (72.0 %) |

|    |        |        |                   |          |
|----|--------|--------|-------------------|----------|
|    |        |        | HOMO-1 -> LUMO+4  | (2.4 %)  |
|    |        |        | HOMO -> LUMO+4    | (22.3 %) |
| 12 | 336.57 | 0.0469 | HOMO-9 -> LUMO    | (11.6 %) |
|    |        |        | HOMO-9 -> LUMO+1  | (2.4 %)  |
|    |        |        | HOMO-8 -> LUMO    | (8.3 %)  |
|    |        |        | HOMO-8 -> LUMO+1  | (15.3 %) |
|    |        |        | HOMO-7 -> LUMO+1  | (56.8 %) |
| 13 | 332.35 | 0.1507 | HOMO-9 -> LUMO    | (58.5 %) |
|    |        |        | HOMO-8 -> LUMO    | (4.3 %)  |
|    |        |        | HOMO-8 -> LUMO+1  | (5.4 %)  |
|    |        |        | HOMO-7 -> LUMO+1  | (11.8 %) |
|    |        |        | HOMO-7 -> LUMO+2  | (4.4 %)  |
|    |        |        | HOMO-2 -> LUMO+10 | (3.9 %)  |
|    |        |        | HOMO-2 -> LUMO+12 | (2.2 %)  |
| 14 | 328.09 | 0.0235 | HOMO-9 -> LUMO    | (4.1 %)  |
|    |        |        | HOMO-8 -> LUMO+1  | (3.6 %)  |
|    |        |        | HOMO-7 -> LUMO+1  | (2.1 %)  |
|    |        |        | HOMO-6 -> LUMO+10 | (7.6 %)  |
|    |        |        | HOMO-6 -> LUMO+12 | (3.9 %)  |
|    |        |        | HOMO-2 -> LUMO+5  | (8.7 %)  |
|    |        |        | HOMO-2 -> LUMO+6  | (10.0 %) |
|    |        |        | HOMO-2 -> LUMO+10 | (37.4 %) |
|    |        |        | HOMO-2 -> LUMO+12 | (14.4 %) |
| 15 | 321.77 | 0.1418 | HOMO-9 -> LUMO    | (15.1 %) |
|    |        |        | HOMO-8 -> LUMO    | (2.5 %)  |
|    |        |        | HOMO-8 -> LUMO+1  | (69.1 %) |
|    |        |        | HOMO-7 -> LUMO+1  | (2.9 %)  |
|    |        |        | HOMO-7 -> LUMO+2  | (3.2 %)  |
| 16 | 308.31 | 0.2072 | HOMO-9 -> LUMO    | (4.7 %)  |
|    |        |        | HOMO-9 -> LUMO+1  | (2.3 %)  |
|    |        |        | HOMO-8 -> LUMO+2  | (2.4 %)  |
|    |        |        | HOMO-7 -> LUMO+2  | (84.6 %) |

**Table S2.** Selected results of the TD-DFT excited-state transitions for **Ru-F**.

| State | Excitation energy [nm] | $f$    | Main MO transitions with their probabilities |          |
|-------|------------------------|--------|----------------------------------------------|----------|
| 1     | 787.03                 | 0.0142 | HOMO-1 -> LUMO                               | (76.3 %) |
|       |                        |        | HOMO -> LUMO                                 | (20.4 %) |
| 2     | 682.96                 | 0.0508 | HOMO-1 -> LUMO                               | (16.0 %) |
|       |                        |        | HOMO-1 -> LUMO+1                             | (12.9 %) |
|       |                        |        | HOMO -> LUMO                                 | (64.9 %) |
|       |                        |        | HOMO -> LUMO+1                               | (4.0 %)  |
| 3     | 602.53                 | 0.0471 | HOMO-1 -> LUMO+1                             | (20.8 %) |
|       |                        |        | HOMO -> LUMO+1                               | (76.6 %) |
| 4     | 569.76                 | 0.0428 | HOMO-1 -> LUMO                               | (3.7 %)  |
|       |                        |        | HOMO-1 -> LUMO+1                             | (62.0 %) |
|       |                        |        | HOMO -> LUMO                                 | (10.9 %) |
|       |                        |        | HOMO -> LUMO+1                               | (16.3 %) |
|       |                        |        | HOMO -> LUMO+2                               | (4.6 %)  |
| 5     | 491.76                 | 0.026  | HOMO-3 -> LUMO                               | (12.7 %) |
|       |                        |        | HOMO-1 -> LUMO+2                             | (5.8 %)  |
|       |                        |        | HOMO -> LUMO+2                               | (77.5 %) |
| 6     | 483.37                 | 0.0616 | HOMO-3 -> LUMO                               | (25.9 %) |
|       |                        |        | HOMO-1 -> LUMO+2                             | (71.2 %) |
| 7     | 479.00                 | 0.0922 | HOMO-3 -> LUMO                               | (60.4 %) |
|       |                        |        | HOMO-1 -> LUMO+2                             | (19.0 %) |
|       |                        |        | HOMO -> LUMO+2                               | (15.5 %) |
| 8     | 461.66                 | 0.0262 | HOMO-5 -> LUMO                               | (97.8 %) |
| 9     | 389.18                 | 0.0209 | HOMO -> LUMO+3                               | (60.8 %) |
|       |                        |        | HOMO -> LUMO+4                               | (33.7 %) |
| 10    | 381.95                 | 0.0212 | HOMO-8 -> LUMO                               | (14.1 %) |
|       |                        |        | HOMO-1 -> LUMO+3                             | (62.0 %) |
|       |                        |        | HOMO-1 -> LUMO+4                             | (9.3 %)  |
|       |                        |        | HOMO -> LUMO+4                               | (10.4 %) |
| 11    | 339.83                 | 0.0596 | HOMO-8 -> LUMO                               | (18.4 %) |



|    |        |        |                   |          |
|----|--------|--------|-------------------|----------|
|    |        |        | HOMO-8 -> LUMO+1  | (13.6 %) |
|    |        |        | HOMO-7 -> LUMO+1  | (56.2 %) |
| 12 | 332.26 | 0.0508 | HOMO-9 -> LUMO    | (35.5 %) |
|    |        |        | HOMO-8 -> LUMO    | (4.0 %)  |
|    |        |        | HOMO-8 -> LUMO+1  | (39.2 %) |
|    |        |        | HOMO-7 -> LUMO+1  | (4.4 %)  |
|    |        |        | HOMO-7 -> LUMO+2  | (2.0 %)  |
|    |        |        | HOMO-2 -> LUMO+10 | (4.2 %)  |
| 13 | 322.20 | 0.2337 | HOMO-9 -> LUMO    | (49.7 %) |
|    |        |        | HOMO-8 -> LUMO+1  | (31.7 %) |
|    |        |        | HOMO-7 -> LUMO+2  | (7.8 %)  |
| 14 | 308.11 | 0.2324 | HOMO-9 -> LUMO    | (7.3 %)  |
|    |        |        | HOMO-9 -> LUMO+1  | (2.1 %)  |
|    |        |        | HOMO-8 -> LUMO+2  | (3.0 %)  |
|    |        |        | HOMO-7 -> LUMO+2  | (82.0 %) |

**Table S3.** Selected results of the TD-DFT excited-state transitions for **Ru–Me**.

| State | Excitation energy [nm] | $f$    | Main MO transitions with their probabilities |          |
|-------|------------------------|--------|----------------------------------------------|----------|
| 1     | 782.78                 | 0.0162 | HOMO-1 -> LUMO                               | (73.6 %) |
|       |                        |        | HOMO -> LUMO                                 | (23.2 %) |
| 2     | 679.61                 | 0.0534 | HOMO-1 -> LUMO                               | (18.7 %) |
|       |                        |        | HOMO-1 -> LUMO+1                             | (10.9 %) |
|       |                        |        | HOMO -> LUMO                                 | (64.5 %) |
|       |                        |        | HOMO -> LUMO+1                               | (3.9 %)  |
| 3     | 587.62                 | 0.049  | HOMO-1 -> LUMO+1                             | (28.5 %) |
|       |                        |        | HOMO -> LUMO+1                               | (68.4 %) |
| 4     | 555.58                 | 0.0412 | HOMO-1 -> LUMO                               | (3.4 %)  |
|       |                        |        | HOMO-1 -> LUMO+1                             | (54.9 %) |
|       |                        |        | HOMO -> LUMO                                 | (8.7 %)  |
|       |                        |        | HOMO -> LUMO+1                               | (23.2 %) |
|       |                        |        | HOMO -> LUMO+2                               | (7.0 %)  |
| 5     | 492.45                 | 0.0407 | HOMO-3 -> LUMO                               | (5.2 %)  |
|       |                        |        | HOMO-1 -> LUMO+2                             | (8.4 %)  |
|       |                        |        | HOMO -> LUMO+2                               | (80.4 %) |
| 6     | 484.19                 | 0.0705 | HOMO-3 -> LUMO                               | (5.0 %)  |
|       |                        |        | HOMO-1 -> LUMO+2                             | (85.1 %) |
|       |                        |        | HOMO -> LUMO+2                               | (4.4 %)  |
| 7     | 475.41                 | 0.0717 | HOMO-3 -> LUMO                               | (88.9 %) |
|       |                        |        | HOMO-1 -> LUMO+2                             | (2.1 %)  |
|       |                        |        | HOMO -> LUMO+2                               | (6.1 %)  |
| 8     | 456.44                 | 0.0245 | HOMO-5 -> LUMO                               | (97.7 %) |
| 9     | 386.14                 | 0.039  | HOMO -> LUMO+3                               | (92.7 %) |
|       |                        |        | HOMO -> LUMO+4                               | (2.7 %)  |
| 10    | 381.44                 | 0.0148 | HOMO-8 -> LUMO                               | (8.7 %)  |
|       |                        |        | HOMO-1 -> LUMO+3                             | (87.6 %) |
| 11    | 337.02                 | 0.0529 | HOMO-9 -> LUMO                               | (10.9 %) |

|    |        |        |                   |          |
|----|--------|--------|-------------------|----------|
|    |        |        | HOMO-9 -> LUMO+1  | (2.5 %)  |
|    |        |        | HOMO-8 -> LUMO    | (9.6 %)  |
|    |        |        | HOMO-8 -> LUMO+1  | (12.9 %) |
|    |        |        | HOMO-7 -> LUMO+1  | (57.1 %) |
| 12 | 332.57 | 0.1636 | HOMO-9 -> LUMO    | (61.9 %) |
|    |        |        | HOMO-8 -> LUMO    | (4.0 %)  |
|    |        |        | HOMO-8 -> LUMO+1  | (3.6 %)  |
|    |        |        | HOMO-7 -> LUMO+1  | (9.2 %)  |
|    |        |        | HOMO-7 -> LUMO+2  | (4.9 %)  |
|    |        |        | HOMO-2 -> LUMO+10 | (4.5 %)  |
|    |        |        | HOMO-2 -> LUMO+12 | (2.6 %)  |
| 13 | 328.45 | 0.0331 | HOMO-9 -> LUMO    | (5.7 %)  |
|    |        |        | HOMO-8 -> LUMO+1  | (2.3 %)  |
|    |        |        | HOMO-7 -> LUMO+1  | (2.2 %)  |
|    |        |        | HOMO-6 -> LUMO+10 | (7.6 %)  |
|    |        |        | HOMO-6 -> LUMO+12 | (3.8 %)  |
|    |        |        | HOMO-2 -> LUMO+5  | (7.6 %)  |
|    |        |        | HOMO-2 -> LUMO+6  | (9.8 %)  |
|    |        |        | HOMO-2 -> LUMO+10 | (38.6 %) |
|    |        |        | HOMO-2 -> LUMO+12 | (14.5 %) |
| 14 | 320.95 | 0.1286 | HOMO-9 -> LUMO    | (10.1 %) |
|    |        |        | HOMO-8 -> LUMO    | (2.9 %)  |
|    |        |        | HOMO-8 -> LUMO+1  | (74.2 %) |
|    |        |        | HOMO-7 -> LUMO+1  | (2.6 %)  |
|    |        |        | HOMO-7 -> LUMO+2  | (2.8 %)  |
| 15 | 309.8  | 0.2138 | HOMO-9 -> LUMO    | (5.0 %)  |
|    |        |        | HOMO-9 -> LUMO+1  | (2.2 %)  |
|    |        |        | HOMO-8 -> LUMO+1  | (2.1 %)  |
|    |        |        | HOMO-7 -> LUMO+2  | (84.5 %) |

**Table S4.** Selected results of the TD-DFT excited-state transitions for **Ru–MeO**.

| State | Excitation energy [nm] | $f$    | Main MO transitions with their probabilities |          |
|-------|------------------------|--------|----------------------------------------------|----------|
| 1     | 788.97                 | 0.0161 | HOMO-1 -> LUMO                               | (45.2 %) |
|       |                        |        | HOMO -> LUMO                                 | (52.0 %) |
| 2     | 673.38                 | 0.0527 | HOMO-1 -> LUMO                               | (42.2 %) |
|       |                        |        | HOMO-1 -> LUMO+1                             | (6.5 %)  |
|       |                        |        | HOMO -> LUMO                                 | (39.1 %) |
|       |                        |        | HOMO -> LUMO+1                               | (10.0 %) |
| 3     | 581.27                 | 0.0481 | HOMO-1 -> LUMO+1                             | (63.5 %) |
|       |                        |        | HOMO -> LUMO+1                               | (33.5 %) |
| 4     | 557.36                 | 0.0534 | HOMO-1 -> LUMO                               | (7.5 %)  |
|       |                        |        | HOMO-1 -> LUMO+1                             | (25.6 %) |
|       |                        |        | HOMO -> LUMO                                 | (5.8 %)  |
|       |                        |        | HOMO -> LUMO+1                               | (50.3 %) |
|       |                        |        | HOMO -> LUMO+2                               | (8.9 %)  |
| 5     | 494.96                 | 0.045  | HOMO-3 -> LUMO                               | (3.1 %)  |
|       |                        |        | HOMO-1 -> LUMO+2                             | (11.6 %) |
|       |                        |        | HOMO -> LUMO+1                               | (3.6 %)  |
|       |                        |        | HOMO -> LUMO+2                               | (77.7 %) |
| 6     | 486.21                 | 0.0755 | HOMO-1 -> LUMO+2                             | (84.5 %) |
|       |                        |        | HOMO -> LUMO+2                               | (8.5 %)  |
| 7     | 472.23                 | 0.0606 | HOMO-3 -> LUMO                               | (94.8 %) |
|       |                        |        | HOMO -> LUMO+2                               | (2.9 %)  |
| 8     | 453.23                 | 0.0237 | HOMO-5 -> LUMO                               | (96.9 %) |
|       |                        |        | HOMO-4 -> LUMO                               | (2.8 %)  |
| 9     | 399.69                 | 0.0149 | HOMO-6 -> LUMO                               | (94.2 %) |
| 10    | 375.93                 | 0.0101 | HOMO-1 -> LUMO+3                             | (9.1 %)  |
|       |                        |        | HOMO -> LUMO+3                               | (86.6 %) |
| 11    | 372.75                 | 0.0111 | HOMO-8 -> LUMO                               | (8.1 %)  |
|       |                        |        | HOMO-3 -> LUMO+2                             | (3.4 %)  |
|       |                        |        | HOMO-1 -> LUMO+3                             | (80.0 %) |

|    |        |        |                   |          |
|----|--------|--------|-------------------|----------|
|    |        |        | HOMO -> LUMO+3    | (5.6 %)  |
| 12 | 367.88 | 0.0103 | HOMO-3 -> LUMO+2  | (93.0 %) |
|    |        |        | HOMO-1 -> LUMO+3  | (2.7 %)  |
|    |        |        | HOMO -> LUMO+3    | (2.7 %)  |
| 13 | 366.18 | 0.0221 | HOMO-8 -> LUMO    | (6.5 %)  |
|    |        |        | HOMO-1 -> LUMO+3  | (2.3 %)  |
|    |        |        | HOMO -> LUMO+4    | (86.2 %) |
| 14 | 351.56 | 0.0119 | HOMO-8 -> LUMO    | (30.5 %) |
|    |        |        | HOMO-6 -> LUMO+1  | (32.2 %) |
|    |        |        | HOMO-1 -> LUMO+4  | (23.1 %) |
|    |        |        | HOMO -> LUMO+4    | (8.5 %)  |
| 15 | 339.18 | 0.0562 | HOMO-8 -> LUMO    | (19.2 %) |
|    |        |        | HOMO-8 -> LUMO+1  | (8.3 %)  |
|    |        |        | HOMO-6 -> LUMO+1  | (56.7 %) |
|    |        |        | HOMO-6 -> LUMO+2  | (2.1 %)  |
|    |        |        | HOMO-1 -> LUMO+4  | (5.1 %)  |
| 16 | 332.03 | 0.1164 | HOMO-9 -> LUMO    | (59.0 %) |
|    |        |        | HOMO-8 -> LUMO+1  | (6.0 %)  |
|    |        |        | HOMO-7 -> LUMO+10 | (2.1 %)  |
|    |        |        | HOMO-6 -> LUMO+2  | (4.7 %)  |
|    |        |        | HOMO-2 -> LUMO+6  | (2.5 %)  |
|    |        |        | HOMO-2 -> LUMO+10 | (11.1 %) |
|    |        |        | HOMO-2 -> LUMO+12 | (5.0 %)  |
| 17 | 328.49 | 0.0584 | HOMO-9 -> LUMO    | (15.7 %) |
|    |        |        | HOMO-8 -> LUMO+1  | (4.8 %)  |
|    |        |        | HOMO-7 -> LUMO+10 | (6.4 %)  |
|    |        |        | HOMO-7 -> LUMO+12 | (3.1 %)  |
|    |        |        | HOMO-6 -> LUMO+2  | (3.2 %)  |
|    |        |        | HOMO-2 -> LUMO+5  | (6.2 %)  |
|    |        |        | HOMO-2 -> LUMO+6  | (7.6 %)  |
|    |        |        | HOMO-2 -> LUMO+10 | (33.2 %) |
|    |        |        | HOMO-2 -> LUMO+12 | (12.0 %) |

---

|       |        |        |                  |          |
|-------|--------|--------|------------------|----------|
| 18    | 318.76 | 0.1189 | HOMO-9 -> LUMO   | (8.4 %)  |
|       |        |        | HOMO-8 -> LUMO   | (3.3 %)  |
|       |        |        | HOMO-8 -> LUMO+1 | (73.0 %) |
|       |        |        | HOMO-6 -> LUMO+1 | (2.1 %)  |
|       |        |        | HOMO-6 -> LUMO+2 | (5.4 %)  |
|       |        |        | HOMO-1 -> LUMO+4 | (2.7 %)  |
| <hr/> |        |        |                  |          |
| 19    | 312.02 | 0.2547 | HOMO-9 -> LUMO   | (9.0 %)  |
|       |        |        | HOMO-8 -> LUMO+1 | (3.4 %)  |
|       |        |        | HOMO-6 -> LUMO+2 | (80.2 %) |

---
